# Supplementary material for: Rapid Induction of COOLing in Stroke Patients (iCOOL1): a randomised pilot study comparing cold infusions with nasopharyngeal cooling
Source: PubMed Central journal article supplement (PMC4234831; doi:10.1186/s13054-014-0582-1), 2014-10-27
Supplement: 13054_2014_582_MOESM1_ESM.pdf [file 13054_2014_582_MOESM1_ESM.pdf]

**Additional Table:** Safety laboratory. Mean values for each group and corresponding level of significance  
 \*  $P < 0.05$

|                                | CI     |       | RC     |       | p <sup>†</sup> |
|--------------------------------|--------|-------|--------|-------|----------------|
|                                | Mean   | SD    | Mean   | SD    |                |
| <b>Inflammation</b>            |        |       |        |       |                |
| Leucocytes, /nL                |        |       |        |       |                |
| 0h                             | 11,92  | 4,34  | 11,02  | 4,10  | n.s.           |
| 12h                            | 11,05  | 3,69  | 13,51  | 10,85 | n.s.           |
| 24h                            | 9,78   | 3,16  | 12,84  | 7,75  | n.s.           |
| C-reactive protein, mg/l       |        |       |        |       |                |
| 0h                             | 104,92 | 64,37 | 85,25  | 53,37 | n.s.           |
| 12h                            | 118,75 | 51,74 | 132,26 | 44,65 | n.s.           |
| 24h                            | 129,93 | 53,25 | 168,26 | 42,23 | n.s.           |
| Procalcitonin, ng/ml           |        |       |        |       |                |
| 0h                             | 0,12   | 0,08  | 0,30   | 0,35  | n.s.           |
| 12h                            | 0,17   | 0,20  | 0,33   | 0,44  | n.s.           |
| 24h                            | 0,82   | 2,06  | 0,25   | 0,20  | n.s.           |
| <b>Electrolytes</b>            |        |       |        |       |                |
| Sodium, mmol/l                 |        |       |        |       |                |
| 0h                             | 146,40 | 4,70  | 149,10 | 16,16 | n.s.           |
| 12h                            | 147,90 | 4,15  | 149,11 | 13,62 | n.s.           |
| 24h                            | 148,00 | 5,50  | 150,30 | 12,68 | n.s.           |
| Potassium, mmol/l              |        |       |        |       |                |
| 0h                             | 4,25   | 0,34  | 4,27   | 0,45  | n.s.           |
| 12h                            | 4,28   | 0,31  | 4,32   | 0,41  | n.s.           |
| 24h                            | 4,16   | 0,42  | 4,29   | 0,44  | n.s.           |
| <b>Brain injury</b>            |        |       |        |       |                |
| Neuron-specific enolase, µg/l  |        |       |        |       |                |
| 0h                             | 23,55  | 7,99  | 27,03  | 12,02 | n.s.           |
| 12h                            | 22,55  | 10,25 | 26,70  | 13,54 | n.s.           |
| 24h                            | 24,84  | 13,14 | 32,36  | 24,75 | n.s.           |
| S100, µg/l                     |        |       |        |       |                |
| 0h                             | 0,65   | 0,58  | 0,88   | 0,98  | n.s.           |
| 12h                            | 0,70   | 0,68  | 1,41   | 1,85  | n.s.           |
| 24h                            | 0,53   | 0,38  | 1,26   | 1,76  | n.s.           |
| <b>Coagulation</b>             |        |       |        |       |                |
| International normalized ratio |        |       |        |       | n.s.           |
| 0h                             | 1,03   | 0,08  | 1,02   | 0,07  | n.s.           |
| 12h                            | 1,03   | 0,09  | 1,03   | 0,07  | n.s.           |
| 24h                            | 1,01   | 0,09  | 1,05   | 0,08  |                |
| Thrombin time, sec             |        |       |        |       |                |
| 0h                             | 15,83  | 2,78  | 15,52  | 1,25  | n.s.           |
| 12h                            | 14,82  | 0,94  | 25,60  | 33,18 | n.s.           |
| 24h                            | 15,09  | 1,03  | 25,86  | 33,11 | n.s.           |
| Thrombocytes, /nl              |        |       |        |       |                |
| 0h                             | 215,10 | 40,54 | 237,30 | 35,72 | n.s.           |
| 12h                            | 212,70 | 36,55 | 218,60 | 42,24 | n.s.           |
| 24h                            | 202,20 | 31,25 | 203,00 | 47,90 | n.s.           |
| D-dimer, mg/l                  |        |       |        |       |                |

|                                  |        |        |        |        |     |      |
|----------------------------------|--------|--------|--------|--------|-----|------|
| 0h                               | 3,25   | 2,25   | 5,76   | 4,92   | ] * | n.s. |
| 12h                              | 3,40   | 3,36   | 3,67   | 3,11   |     | n.s. |
| 24h                              | 3,94   | 4,37   | 4,76   | 6,90   |     | n.s. |
| <b>Blood</b>                     |        |        |        |        |     |      |
| Hemoglobin, g/dl                 |        |        |        |        |     |      |
| 0h                               | 11,03  | 1,71   | 11,30  | 1,64   |     | n.s. |
| 12h                              | 10,69  | 1,79   | 11,40  | 1,53   |     | n.s. |
| 24h                              | 10,58  | 1,20   | 11,35  | 1,57   |     | n.s. |
| Hematocrit, %                    |        |        |        |        |     |      |
| 0h                               | 0,33   | 0,05   | 0,33   | 0,05   | ] * | n.s. |
| 12h                              | 0,32   | 0,05   | 0,34   | 0,04   |     | n.s. |
| 24h                              | 0,31   | 0,04   | 0,34   | 0,05   |     | n.s. |
| <b>Cardiac markers</b>           |        |        |        |        |     |      |
| Creatin kinase, U/l              |        |        |        |        |     |      |
| 0h                               | 333,00 | 227,45 | 321,40 | 389,12 |     | n.s. |
| 12h                              | 379,70 | 343,57 | 474,30 | 515,47 |     | n.s. |
| 24h                              | 425,00 | 437,09 | 554,10 | 819,58 |     | n.s. |
| CK-MB, U/l                       |        |        |        |        |     |      |
| 0h                               | 16,40  | 6,57   | 14,60  | 6,95   |     | n.s. |
| 12h                              | 16,50  | 7,37   | 21,80  | 15,91  |     | n.s. |
| 24h                              | 17,70  | 9,55   | 30,40  | 25,61  |     | n.s. |
| High-sensitive Troponin T, pg/ml |        |        |        |        |     |      |
| 0h                               | 14,80  | 8,53   | 34,20  | 68,83  | ] * | n.s. |
| 12h                              | 14,90  | 6,17   | 33,00  | 66,24  |     | n.s. |
| 24h                              | 13,90  | 9,67   | 27,70  | 70,47  |     | n.s. |

### Blood gas analysis

|                          |        |       |        |       |     |      |
|--------------------------|--------|-------|--------|-------|-----|------|
| Hemoglobin, g/dl         |        |       |        |       |     |      |
| 0h                       | 11,54  | 1,90  | 11,65  | 1,44  |     | n.s. |
| 2h                       | 11,30  | 1,73  | 11,77  | 1,51  |     | n.s. |
| Hämatocrit, %            |        |       |        |       |     |      |
| 0h                       | 0,34   | 0,05  | 0,35   | 0,05  |     | n.s. |
| 2h                       | 0,33   | 0,04  | 0,35   | 0,04  |     | n.s. |
| pH                       |        |       |        |       |     |      |
| 0h                       | 7,43   | 0,05  | 7,39   | 0,05  | ] * | n.s. |
| 2h                       | 7,38   | 0,04  | 7,37   | 0,05  |     | n.s. |
| PaCO <sub>2</sub> , mmHg |        |       |        |       |     |      |
| 0h                       | 37,22  | 6,18  | 37,70  | 4,14  |     | n.s. |
| 2h                       | 39,89  | 3,41  | 39,80  | 6,75  |     | n.s. |
| PaO <sub>2</sub> , mmHg  |        |       |        |       |     |      |
| 0h                       | 97,00  | 24,95 | 117,60 | 22,36 |     | n.s. |
| 2h                       | 95,80  | 20,86 | 114,60 | 28,57 |     | n.s. |
| Base excess, mmol/L      |        |       |        |       |     |      |
| 0h                       | -0,48  | 2,35  | -2,53  | 2,40  | ] * | n.s. |
| 2h                       | -2,15  | 1,97  | -2,90  | 2,69  |     | n.s. |
| Potassium, mmol/l        |        |       |        |       |     |      |
| 0h                       | 4,11   | 0,34  | 4,15   | 0,44  |     | n.s. |
| 2h                       | 4,06   | 0,34  | 4,02   | 0,40  |     | n.s. |
| Sodium, mmol/l           |        |       |        |       |     |      |
| 0h                       | 145,44 | 6,31  | 147,70 | 17,13 |     | n.s. |

|                           |        |       |        |       |      |
|---------------------------|--------|-------|--------|-------|------|
| 2h                        | 145,00 | 7,12  | 146,90 | 14,57 | n.s. |
| Chlorid, mmol/L           |        |       |        |       |      |
| 0h                        | 115,90 | 6,21  | 114,11 | 5,58  | n.s. |
| 2h                        | 117,10 | 6,47  | 118,60 | 14,25 | n.s. |
| Glucose, mg/dl            |        |       |        |       |      |
| 0h                        | 144,20 | 14,90 | 133,60 | 28,23 | n.s. |
| 2h                        | 136,30 | 20,33 | 134,40 | 36,65 | n.s. |
| Lactate, mg/dl            |        |       |        |       |      |
| 0h                        | 11,73  | 5,36  | 9,93   | 3,35  | n.s. |
| 2h                        | 9,42   | 1,26  | 10,64  | 5,42  | n.s. |
| HCO <sub>3</sub> , mmol/l |        |       |        |       |      |
| 0h                        | 23,36  | 1,72  | 22,52  | 2,05  | n.s. |
| 2h                        | 22,14  | 1,55  | 21,96  | 2,52  | n.s. |

---
